# Supplementary material for: Region-specific depletion of synaptic mitochondria in the brains of patients with Alzheimer’s disease
Source: PubMed Central journal article supplement (PMC6208730; doi:10.1007/s00401-018-1903-2), 2018-09-06
Supplement: 401_2018_1903_MOESM2_ESM.pdf [file 401_2018_1903_MOESM2_ESM.pdf]

**Region-specific depletion of synaptic mitochondria in the brains of patients with Alzheimer's disease** *Acta Neuropathologica* 2018

Eleanor K. Pickett<sup>1</sup>, Jamie Rose,<sup>1</sup> Caoimhe McCrory<sup>1</sup>, Chris-Anne McKenzie<sup>2</sup>, Declan King<sup>1</sup>, Colin Smith<sup>2</sup>, Thomas H Gillingwater<sup>1</sup>, Christopher M. Henstridge<sup>1</sup>, and Tara L. Spires-Jones<sup>1\*</sup>

Corresponding Author Email: [Tara.Spires-Jones@ed.ac.uk](mailto:Tara.Spires-Jones@ed.ac.uk)

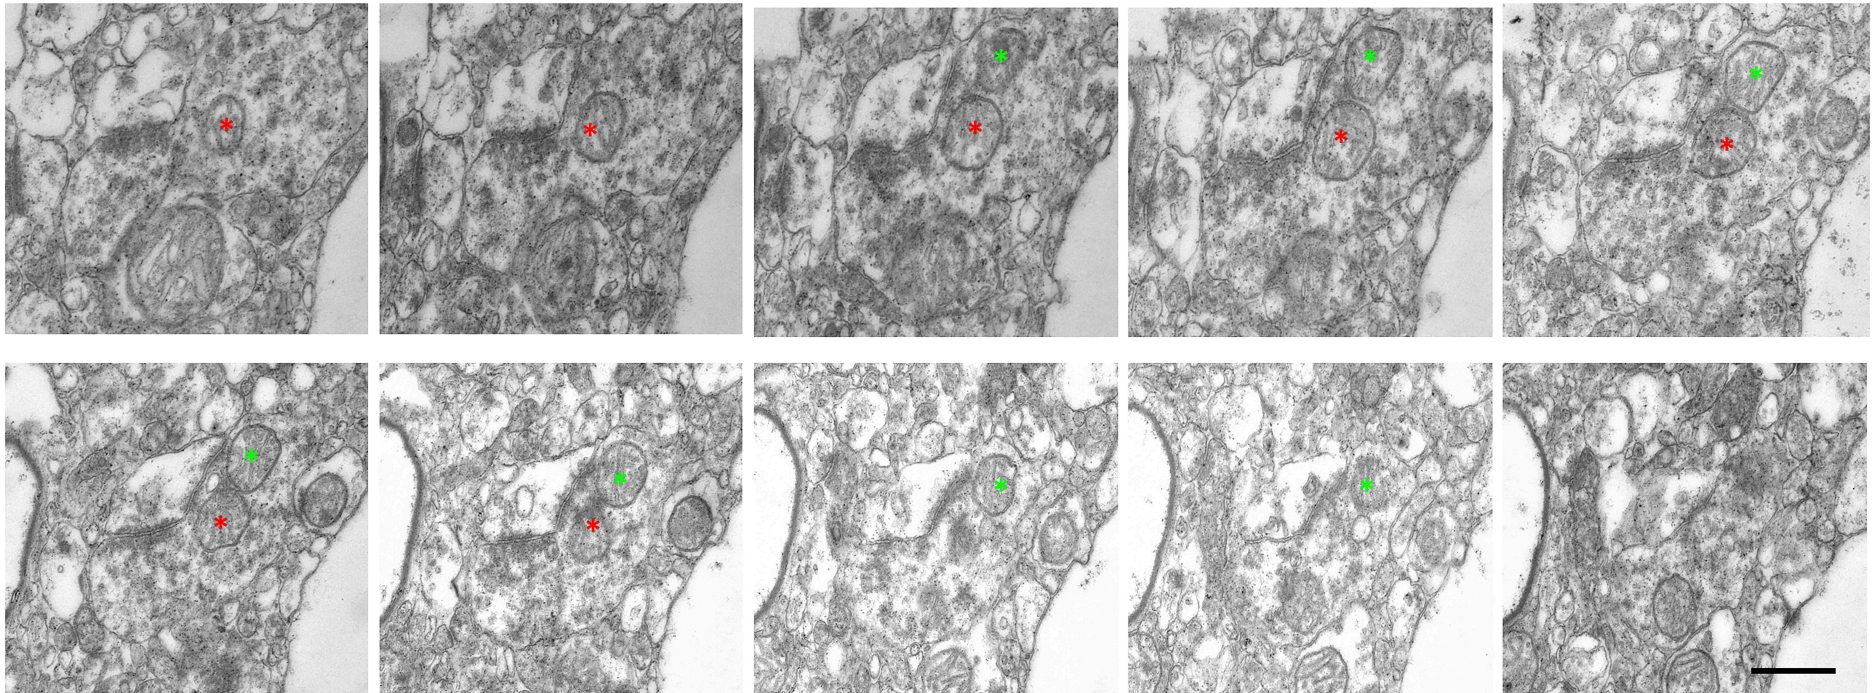

**Online Resource 2:** Multiple mitochondrial profiles confirmed to correspond to multiple mitochondria in 3D reconstructions. 10 serial 70nm sections show two complete mitochondria (labelled with asterisks) in a presynaptic terminal. Scale bar 500 nm.
