# Supplementary material for: Region-specific depletion of synaptic mitochondria in the brains of patients with Alzheimer’s disease
Source: Acta Neuropathol. 2018 Sep 6;136(5):747–57. doi: 10.1007/s00401-018-1903-2 (PMC6208730; doi:10.1007/s00401-018-1903-2)
Supplement: Supplementary file 1 — Supplementary material 1 (XLSX 13 kb) [file 401_2018_1903_MOESM1_ESM.xlsx]

## Sheet: Sheet1
Region-specific depletion of synaptic mitochondria in the brains of patients with Alzheimer’s disease. Acta Neuropathologica 2018
Eleanor K. Pickett, Jamie Rose, Caoimhe McCrory, Chris-Anne McKenzie, Declan King, Colin Smith, Thomas H Gillingwater, Christopher M. Henstridge, and Tara L. Spires-Jones
Corresponding Author Email: Tara.Spires-Jones@ed.ac.uk
Online Resource 1: Case information and analysed data from each case
Brain bank number	diagnosis	Sex	Age	PMI (Hours)	pH	Brain Weight (g)	Cause of Death	Braak Stage	Other Neuropath findings	% Presynapses containing mito BA41/42	% Presynapses containing mito BA46	% presynapses with multiple mito BA41/42	% presynapses with multiple mito BA46	% Post synapses with mito BA41/42	% Post synapses with mito BA46	% Post synapses with multiple mito BA41/42	% Post synapses with multiple mito BA46	% synpases with a mito (pre or post) BA41/42	% synpases with a mito (pre or post) BA46	synapse apposition length (um) BA41/42	synapse apposition length (um) BA46	% Post synapse with MVB BA41/42	% Post synapse with MVB BA46	% synapses with mito pre AND post BA41/42	% synapses with mito pre AND post BA46
BBN001.26718	AD	M	78	74	6.13	1367	Recurrent Aspiration Pneumonia, Alzheimers Disease	VI	AD, Thal 5, moderate Sporadic CAA, moderate non-amyloid SVD	25	33	0	1	13	9	2	2	34	38	0.424007	0.378135	0	0	4	3
BBN_25739	AD	F	85	45	5.77	1375	-	VI	AD, sCAA	28	37	0	4	15	13	3	0	39	46	0.409136	0.429032	2		4	4
BBN001.26500	AD	M	81	83	6.25	1315	Acute pyelonephritis, Chronic indwelling catheter, Alzheimer's Disease, Ischaemic Heart Disease, Hypertension	VI	AD, Thal 5, Mild arteriolar a-beta CAA, Severe non-amyloid SVD, MCA terriroty lacunar infarcts	29	36	2	2	11	23	2	3	38	49	0.421593	0.432788	1	0	2	8
BBN_19690	AD	M	57	58	5.9	1200	-	VI	AD	18	32	2	0	8	12	0	0	24	42	0.469961	0.455664	0	0	2	2
BBN001.28410	AD	F	62	109	6.04	1029	Inanation, Alzheimer's Disease	VI	AD, Thal 5, Mild arteriolar CAA, mild WM pathology, Moderate non-amyloid SVD	19	28	0	4	12	13	2	4	30	36	0.388227	0.48557	4	1	1	4
BBN001.28771	AD	M	85	91	5.95	1183	Alzheimer's Disease	VI	AD, Thal 5, Severe arteriolar CAA, moderate WM patholoy, moderate non-amyloid SVD	35	25	3	4	17	17	2	0	45	41	0.47654	0.476945	3	1	7	1
BBN_24322	AD	M	80	101	6.1	1410	-	VI	sCAA	28	32	0	1	10	15	1	2	37	42	0.48988	0.444544	0	1	1	5
BBN001.28796	AD	F	60	54	5.95	1150	Alzheimer's Disease	VI	Familial AD, Thal 5, Severe arteriolar CAA, LBD brain stem subtype, mild WM pathology, mild non-amylois SVD	14		0		8		0		19				2		3
BBN001.28402	control	M	79	49	6.33	1503	Hospital acquired pneumonia, Alcohol related liver cirrhosis with ascites, severe LVSD, Chronic obstructive pulmonary disease	I	mild WM pathology, moderate non-amyloid SVD, hepatic encephalopathy, Thal 2	32	43	3	2	13	6	0	1	42	47	0.428411	0.412488	0	0	3	2
BBN_19686	control	F	77	75	6.5	1320	-	I	sCAA, lacunar vascular disease	26	35	4	3	11	17	0	5	35	47	0.456686	0.418921	0	0	2	5
BBN001.26495	control	M	78	39	6.17	1290	Amyloidosis, Multiple myeloma, Chronic obsctructive pulmoary disease	I	-	30	33	2	2	13	10	2	2	41	38	0.46184	0.434574	0	0	2	5
BBN001.28406	control	M	79	72	6.13	1437	Suspected lung carcinoma, Pneumonia	II	moderate arteriolar CAA, Thal 2, mild WM pathology, mild non-amyloid SVD	36	45	4	1	14	13	1	0	47	52	0.461024	0.404084	0	1	3	6
BBN001.28793	control	F	79	72	5.95	1219	-	II	Thal 1, moderate WM pathology, moderate non-amyloid SVD	22	23	4	1	14	12	1	1	33	32	0.460022	0.475006	1	1	3	3
BBN001.28794	control	F	79	61	5.76	1289	Metastatic breast cancer	I	mild WM pathology, mild non-amyloid SVD	35	27	7	7	9	18	0	0	41	41	0.489046	0.460327	0	0	3	4
BBN_24340	control	M	53	53	6.5	1400	Haemopericardium, Ruptured myocardial infarct, Coronary thrombosis, Coronary artery athersclerosis	-	No abnormalities		32		3		14		8		40		0.42615		0		5
BBN_16425	control	M	61	99	6.2	1270	Haemopericardium, Ruptured myocardial infarct, Coronary thrombosis, Coronary artery athersclerosis	-	No abnormalities		36		1		9		0		44		0.405791		0		1
BBN_3783	control	M	56	44	5.15	1500	Ischaemic and hypertensive heart disease	-	No abnormalities		31		3		5		0		36		0.436752		0		0
